# Supplementary material for: Rectal HSV-2 Infection May Increase Rectal SIV Acquisition Even in the Context of SIVΔnef Vaccination
Source: PubMed Central journal article supplement (PMC4757571; doi:10.1371/journal.pone.0149491), 2016-02-17

S5 Fig

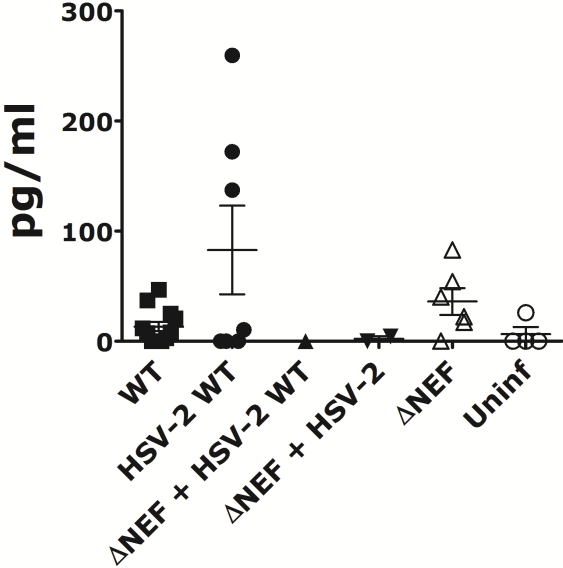

Supplement: pone.0149491.s005.pdf [file pone.0149491.s005.pdf]
